# Supplementary material for: Safety and feasibility of oral immunotherapy to multiple allergens for food allergy
Source: PubMed Central journal article supplement (PMC3913318; doi:10.1186/1710-1492-10-1), 2014-01-15

## 1 SUPPLEMENTAL METHODS

### 2 Participant selection:

3 This phase 1 study was performed in a single center in a hospital setting with Institutional  
4 Review Board (IRB) approval, under Investigational New Drug (IND) approval. Participants were  
5 recruited through advertisement at our institution's as well as local allergy clinics. They were  
6 screened for eligibility after signing informed consent at our research unit. They were eligible  
7 for inclusion if they: (1) were older than 4 years old; (2) had proven sensitivity to peanut  
8 documented by both a skin prick test (with neat extracts from Greer Laboratories, Lenoir, NC)  
9 greater than 7mm (wheal), PN-IgE greater than 2ku/L (ImmunoCAP) [E1]; and (3) had clinical  
10 reactivity proven by positive allergic reaction in a double-blind placebo-controlled oral food  
11 challenge (DBPCFC). Exclusion criteria included: (1) eosinophilic oesophagitis; (2) autoimmune  
12 or (3) severe cardiac diseases; chronic treatment with (4) beta-adrenergic antagonists or (5)  
13 steroids; (6) a history of severe anaphylaxis requiring admission to an ICU; (7) frequent allergic  
14 or non-allergic urticaria; and (8) poorly controlled asthma. DBPCFC was performed on separate  
15 days for each food and for the placebo. All participants performed spirometry as appropriate  
16 per age and had continuous pulse oximetry monitoring and vital signs checked, before and every  
17 15 minutes after being given increasing doses of placebo (oat flour) or allergenic food protein.  
18 Doses were increased following the following scale over 4.5 hours up to a cumulative dose of  
19 182 mg or until an objective reaction occurred. Reaction assessment was based on Bock's  
20 criteria and required skin or upper airway objective signs grade 2 or above; expiratory wheezing  
21 on auscultation or 15% decrease in FEV1; or at least one episode of emesis or diarrhea [E2].

22

23 The doses were as follows:

24

| Dose in mg of protein | Dosing interval in minutes |
|-----------------------|----------------------------|
| 0.1                   | 15                         |
| 1.6                   | 30                         |
| 6                     | 45                         |
| 25                    | 60                         |
| 50                    | 60                         |
| 100                   | 120                        |

25

## 26 **Self-administered epinephrine training**

27 Participants underwent a standardised training on the use and indication of self-administered  
28 epinephrine at screening, which was reviewed on day one and every 3 months afterward and  
29 documented in a log. Training was based on identifying anaphylaxis based on a set of criteria  
30 adapted from the World Allergy Organisation [E3].

31 1. At ANY time: skin or ENT symptoms AND cardiovascular or respiratory symptoms

32 2. After dose: cardiovascular OR respiratory compromise

33 3. After dose: skin or ENT symptoms AND persistent abdominal pain or repetitive vomiting

34 During training, subjects went through all three scenarios with examples including one of  
35 progression from mild symptoms. In the event of mild symptoms, parents and participants were  
36 instructed to refrain from physical activity and to be kept under strict observation for symptoms  
37 that would warrant epinephrine. They were provided examples of cases that escalated from  
38 mild reactions and for which new onset severe symptoms had been missed. The training also  
39 focused on wheezing, which should always be considered a sign of anaphylaxis after a dose and  
40 thus treated with epinephrine rather than albuterol. It was stressed that control of asthma was  
41 paramount as uncontrolled asthma is a risk for refractory and fatal anaphylaxis and that they  
42 should abstain from dosing if wheezing is present at baseline.

## 43 ***Study medication***

44 This study used only food flours/powders permitted by *Food and Drug Administration* (FDA)-  
45 approved GMP guidelines in a phase 1 GMP facility for food allergens at Stanford  
46 University/Lucile Packard Children’s Hospital. A *Chemistry and Manufacturing Control* (CMC)  
47 section was written for each food allergen powder/flour to perform needed assessments for  
48 stability, identity, relative sterility, and purity of each of the food powder/flour. These food  
49 flours/powders include milk powder (Organic Valley, WI), egg powder (Deb El, NJ), peanut flour  
50 (Byrd Mill, VA), walnut flour (Carriere Family Farms, CA), cashew flour (Digestive Wellness, NY),  
51 almond flour (Just Almonds, NV), pecan flour (Green Valley, AZ), hazelnut flour (Holmquist  
52 Hazelnut Orchards, WA), wheat flour (Gold Medal, MN), soy flour (Honeyville Grain, Inc., UT),  
53 and sesame seed flour (Dispasa USA, Inc., TX). For each flour/powder, protein chemistry assays  
54 for stability and contamination testing were performed. Each dose was weighted out by a  
55 nutritionist on a professional-grade balance. Flour/powder protein content was calculated  
56 according to nutritional information provided by manufacturers.

### 57 ***Study design***

58 Participants who reacted only to peanut on their inclusion DBPCFC were assigned to the single  
59 OIT group while those who reacted to multiple foods were assigned to multiple food therapy  
60 (Figure 1). The multi OIT regimen (between two and five food allergens could be used) was  
61 customized to what the participant was found to be allergic to by DBPCFC. For example, if a  
62 participant had been through 6 DBPCFC’s on separate days (a separate DBPCFC for cashew,  
63 sesame, soy, milk, wheat, and placebo; and was found to be allergic to cashew, sesame and soy  
64 by DBPCFC, then those three food flours were used in that participant’s OIT regimen). The OIT  
65 protocol for both groups (single OIT and multi OIT) consisted of three phases: (1) the initial  
66 escalation day (or modified rush day), (2) home dosing with biweekly visits for dose escalations

67 and (3) the maintenance phase (Figure 1). The primary goal of the OIT was to achieve a 10-fold  
68 increase from initial DBPCFC threshold. The dosing protocol was designed to continue dose  
69 increases up to a daily maintenance dose of 4000mg protein of each allergen (up to 20,000 mg  
70 cumulative dose for those on 5 allergens).

71 **Initial Escalation:** On the initial escalation day, all participants were admitted to the Clinical  
72 Translational Food Unit (CTFU) where their doses were administered by trained clinical staff in a  
73 hospital setting, and antihistamines, inhaled beta-2 agonists, solu-medrol and epinephrine were  
74 all made readily available at the bedside. The initial dosing began at 0.1 mg protein of each of  
75 the offending food allergens (up to five) and doses were slowly increased until the participant  
76 reached a dose of 6mg protein (i.e. up to 1.2mg protein of each offending food allergen if the  
77 participant's regimen included 5 allergens, or 6 mg protein for a single allergen in  
78 monotherapy). Food allergens were given over a period of 3 hours. Participants were  
79 monitored every 15 minutes for vital signs and physical assessments throughout the dosing  
80 process and were observed for an additional 2 hours after receiving the final dose. The  
81 participant's starting daily dose was up to a total dose of 6 mg protein (divided evenly into each  
82 of the separate offending food allergen.

| Dose in mg of protein | Dosing interval in minutes |
|-----------------------|----------------------------|
| 0.1                   | 30                         |
| 0.2                   | 30                         |
| 0.4                   | 30                         |
| 0.8                   | 30                         |
| 1.5                   | 30                         |
| 3.0                   | 30                         |
| 6.0                   | 120                        |

83

84 **Home dosing:** Upon confirmation that the dose (up to 6 mg protein of total allergens) could be  
85 ingested safely without an allergic reaction, participants received their dose for the following two

86 weeks to take home. Doses were dispensed as one soufflé cup per day containing all the foods  
87 mixed together. This mix became was considered and treated as a medication in itself with its  
88 own lot number, different from the ones of the various foods that it contained. Participants  
89 were told to ingest their dose after a full meal at approximately the same time each day. Each  
90 food allergen was given simultaneously in applesauce or pudding (or another medium the  
91 participant had shown tolerance to during placebo challenge). They were instructed not to miss  
92 their daily dose. Participants were instructed to take oral cetirizine (dosed as per each product  
93 insert) 1 hour before home doses. Pre-dosing with loratadine was also recommended (as per  
94 each product insert) if patient reported abdominal symptoms. Participants and their families  
95 were given instructions on how to monitor for reactions at home and record any symptoms in  
96 their dosing diary. Research staff kept in close contact to proactively investigate any significant  
97 adverse events, and participants had 24-hour contact information for all study personnel in case  
98 of a significant reaction. All participants were provided with injectable epinephrine devices, oral  
99 antihistamines and a treatment plan for possible allergic reactions.

100 **Dose Escalation:** The participant returned to the CTFU every two weeks for a dose escalation  
101 visit with daily home diaries which detailed any symptoms that occurred and treatments given  
102 during the daily home dosing. Staff reviewed the dose diaries with the participants and their  
103 families at each visit. A physical examination was performed and asthma control was reassessed  
104 by spirometry. If home daily protein flour/powder doses had been well tolerated, the dose was  
105 increased in the hospital setting according to a standard scale (previously described in (11)).

| Dose in mg of protein | Interval in Weeks | % of Increase from previous |
|-----------------------|-------------------|-----------------------------|
| 12 mg                 | 2                 | 100%                        |
| 25 mg                 | 2                 | 108%                        |
| 50 mg                 | 2                 | 100%                        |
| 75 mg                 | 2                 | 50%                         |
| 100 mg                | 2                 | 33%                         |

|           |   |     |
|-----------|---|-----|
| 125 mg    | 2 | 25% |
| 156 mg    | 2 | 25% |
| 195 mg    | 2 | 25% |
| 245 mg    | 2 | 25% |
| 306 mg    | 2 | 25% |
| 383 mg    | 2 | 25% |
| 479 mg    | 2 | 25% |
| 599 mg    | 2 | 25% |
| 749 mg    | 2 | 25% |
| 936 mg    | 2 | 25% |
| 1,170mg   | 2 | 25% |
| 1,463mg   | 2 | 25% |
| 1,829 mg  | 2 | 25% |
| 2,286 mg  | 2 | 25% |
| 2,858 mg  | 2 | 25% |
| 3,573 mg  | 2 | 25% |
| 4,466 mg  | 2 | 25% |
| 5,583 mg  | 2 | 25% |
| 8,374 mg  | 2 | 25% |
| 10,467 mg | 2 | 25% |
| 13,084 mg | 2 | 25% |
| 16,355 mg | 2 | 25% |
| 20,000 mg | 2 | 22% |

106

107

108 Participants were monitored by trained clinicians in the CTFU for at least one hour following  
109 their new dose. If the new dose was tolerated, it became their daily dose for the following two  
110 weeks. Otherwise they continued on their previous dose. Thus, OIT did not advance according  
111 to a fixed calendar but rather was individualized according to participants' allergy safety  
112 outcomes. There was no limit to the number of attempts at a new dose. According to the  
113 investigators assessment, half increases (12.5%) were permitted, especially when external  
114 factors, such as environmental allergies, affected the ability to perform a full up-dose. When a  
115 new regimen was not tolerated, it was decreased to the previously tolerated dose.

116

117

118 E1. Johannsen H, Nolan R, Pascoe EM, Cuthbert P, Noble V, Corderoy T et al. Skin prick testing  
119 and peanut-specific IgE can predict peanut challenge outcomes in preschool children with  
120 peanut sensitization. *Clin Exp Allergy*. 2011 Jul;41(7):994-1000.

121 E2. Bock SA, Sampson HA, Atkins FM, Zieger RS, Lehrer S, Sachs M, et al. Double-blind,  
122 placebo-controlled food challenge (DBPCFC) as an office procedure: a manual. *J Allergy Clin*  
123 *Immunol*. 1988;82:986–97.

124 E3. Simons FE, Arduoso LR, Bilò MB, Dimov V, Ebisawa M, El-Gamal YM, et al. 2012 Update:  
125 World Allergy Organization Guidelines for the assessment and management of anaphylaxis. *Curr*  
126 *Opin Allergy clin Immunol*. 2012; 12(4):389-99.

127

128 **SUPPLEMENTAL TABLES AND FIGURES**

129 **TABLE S1 – Baseline allergy tests to other foods in multi-allergic group**

| Test                                        | MEDIAN | RANGE      |
|---------------------------------------------|--------|------------|
| <b>Walnut (n=14)</b>                        |        |            |
| SPT in mm                                   | 10     | 4-14.5     |
| Specific IgE in ku/L                        | 11.3   | 5.7-52.4   |
| DBPCFC step eliciting symptoms (mg protein) | 25     | 0.1-100    |
| <b>Cashew (n=13)</b>                        |        |            |
| SPT in mm                                   | 13     | 8.5-25.5   |
| Specific IgE in ku/L                        | 16.5   | 3.2-76.0   |
| DBPCFC step eliciting symptoms (mg protein) | 6      | 0.1-100    |
| <b>Pecan (n=7)</b>                          |        |            |
| SPT in mm                                   | 9      | 5.5-12.5   |
| Specific IgE in ku/L                        | 8.6    | 2.36-169.0 |
| DBPCFC step eliciting symptoms (mg protein) | 25     | 1.6-50     |
| <b>Milk (n=7)</b>                           |        |            |
| SPT in mm                                   | 18.5   | 5-20.5     |
| Specific IgE in ku/L                        | 11.3   | 3.6-39.1   |
| DBPCFC step eliciting symptoms (mg protein) | 50     | 25-100     |
| <b>Sesame (n=6)</b>                         |        |            |
| SPT in mm                                   | 12.5   | 10.5-37.5  |
| Specific IgE in ku/L                        | 23.8   | 7.1-65.6   |
| DBPCFC step eliciting symptoms (mg protein) | 50     | 6-100      |
| <b>Egg (n=6)</b>                            |        |            |
| SPT in mm                                   | 10.4   | 7.5-17     |
| Specific IgE in ku/L                        | 11.3   | 2.6-90.6   |
| DBPCFC step eliciting symptoms (mg protein) | 37.5   | 0.1-100    |
| <b>Almond (n=5)</b>                         |        |            |
| SPT in mm                                   | 5.5    | 3-12.5     |
| Specific IgE in ku/L                        | 2.45   | 1.1-3.7    |
| DBPCFC step eliciting symptoms (mg protein) | 25     | 6-100      |
| <b>Hazelnut (n=3)</b>                       |        |            |
| SPT in mm                                   | 18.5   | 14-21      |
| Specific IgE in ku/L                        | 26.1   | 13.4-39.1  |
| DBPCFC step eliciting symptoms (mg protein) | 25     | 25-100     |

130

131



132 **TABLE S2 – FOOD COMBINATIONS IN MULTI-ALLERGIC GROUP**

| <b>Number of foods in mix</b> | <b>Number of participants with mix</b> | <b>Food combination in mix</b>           |
|-------------------------------|----------------------------------------|------------------------------------------|
| 5                             | 1                                      | Peanut, Walnut, Cashew, Hazelnut, Sesame |
| 5                             | 1                                      | Peanut, Walnut, Pecan, Sesame, Egg       |
| 5                             | 1                                      | Peanut, Walnut, Pecan, Cashew, Milk      |
| 5                             | 1                                      | Peanut, Walnut, Cashew, Sesame, Almond   |
| 5                             | 1                                      | Peanut, Walnut, Cashew, Hazelnut, Almond |
| 5                             | 1                                      | Peanut, Walnut, Cashew, Pecan, Almond    |
| 4                             | 1                                      | Peanut, Walnut, Pecan, Hazelnut          |
| 4                             | 1                                      | Peanut, Walnut, Milk, Egg                |
| 4                             | 1                                      | Peanut, Walnut, Pecan, Cashew            |
| 4                             | 1                                      | Peanut, Walnut, Cashew, Sesame           |
| 4                             | 1                                      | Peanut, Sesame, Milk, Egg                |
| 3                             | 3                                      | Peanut, Milk, Egg                        |
| 3                             | 1                                      | Peanut, Walnut, Pecan                    |
| 3                             | 1                                      | Peanut, Walnut, Milk                     |
| 3                             | 1                                      | Peanut, Pecan, Cashew                    |
| 3                             | 1                                      | Peanut, Walnut, Sesame                   |
| 3                             | 1                                      | Peanut, Walnut, Cashew                   |
| 2                             | 4                                      | Peanut, Cashew                           |
| 2                             | 2                                      | Peanut, Almond                           |

133

134

135 **FIGURE S1 – REACTION PROFILE IN MONO-ALLERGIC PARTICIPANTS.** Symptom occurrence  
 136 with (A) initial escalation day, (B) dose escalations and (C) home dosing during OIT to multiple  
 137 foods.

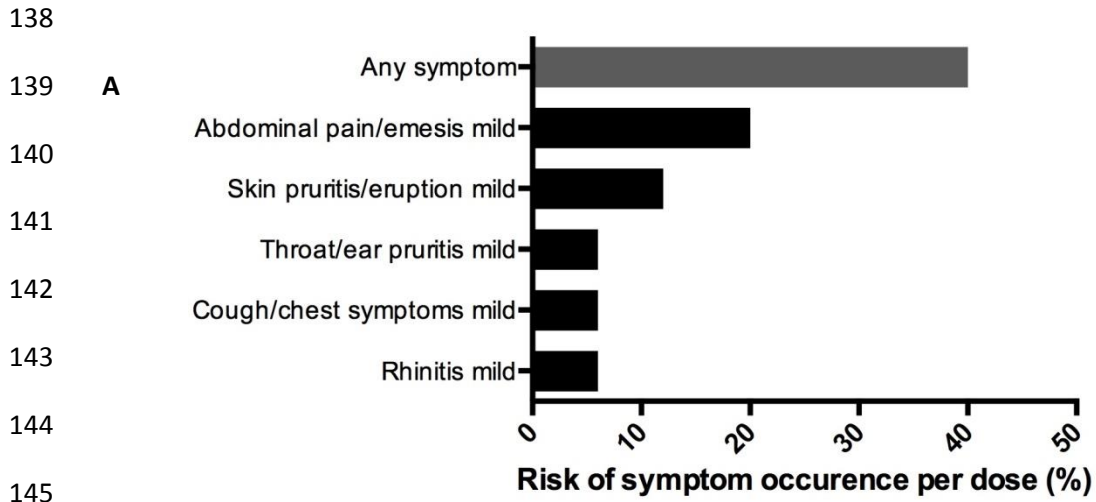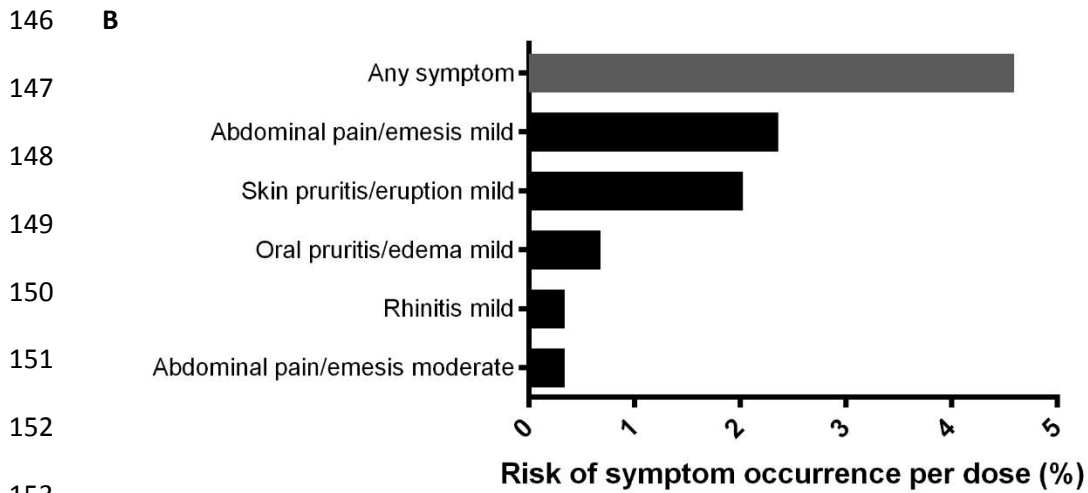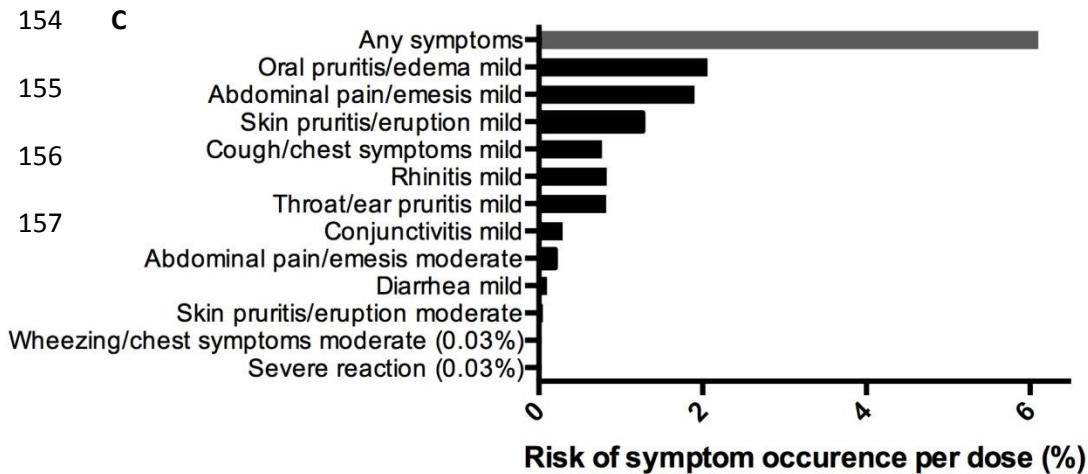

158  
159

**Table S3 – EPINEPHRINE USES**

| <b>Participant</b>                | <b>A</b>                            | <b>B</b>            | <b>C</b>                                 | <b>D</b>                                             |
|-----------------------------------|-------------------------------------|---------------------|------------------------------------------|------------------------------------------------------|
| <b>Group</b>                      | Single OIT                          | Single OIT          | Multi OIT                                | Multi OIT                                            |
| <b>Context</b>                    | Home dosing                         | Home dosing         | Home dosing                              | Home dosing                                          |
| <b>Dose (mg protein)</b>          | 936 mg                              | 1170 mg             | 10903 mg                                 | 599 mg                                               |
| <b>Allergens in mix</b>           | Peanut                              | Peanut              | Peanut, Walnut, Cashew, almond, hazelnut | Peanut, Milk, Egg                                    |
| <b>Symptoms</b>                   | Abdominal pain, urticaria, wheezing | Urticaria, wheezing | Abdominal pain, urticaria, wheezing      | Abdominal pain, angioedema around the eyes, wheezing |
| <b>Time elapsed between:</b>      |                                     |                     |                                          |                                                      |
| <b>Dosing and symptoms</b>        | 20 minutes                          | 40 minutes          | 35 minutes                               | 25 minutes                                           |
| <b>Epinephrine and resolution</b> | 6 minutes                           | 5 minutes           | 6 minutes                                | 3 minutes                                            |

160  
161

162 **FIGURE S2 – SEROLOGICAL ANALYSES FOR OTHER FOODS IN MULTI-SENSITIZED GROUP**

163 Comparison of peanut-specific IgE (A) and IgG4 (B) at baseline and after one year of OIT.

164 \*p=0.016

165 **A**

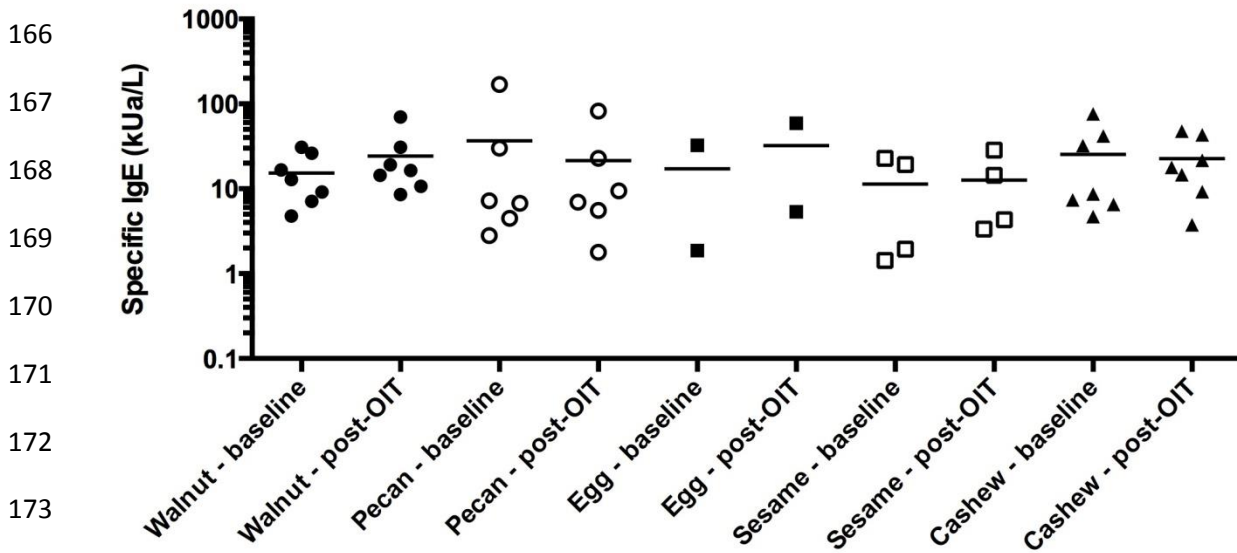

176 **B**

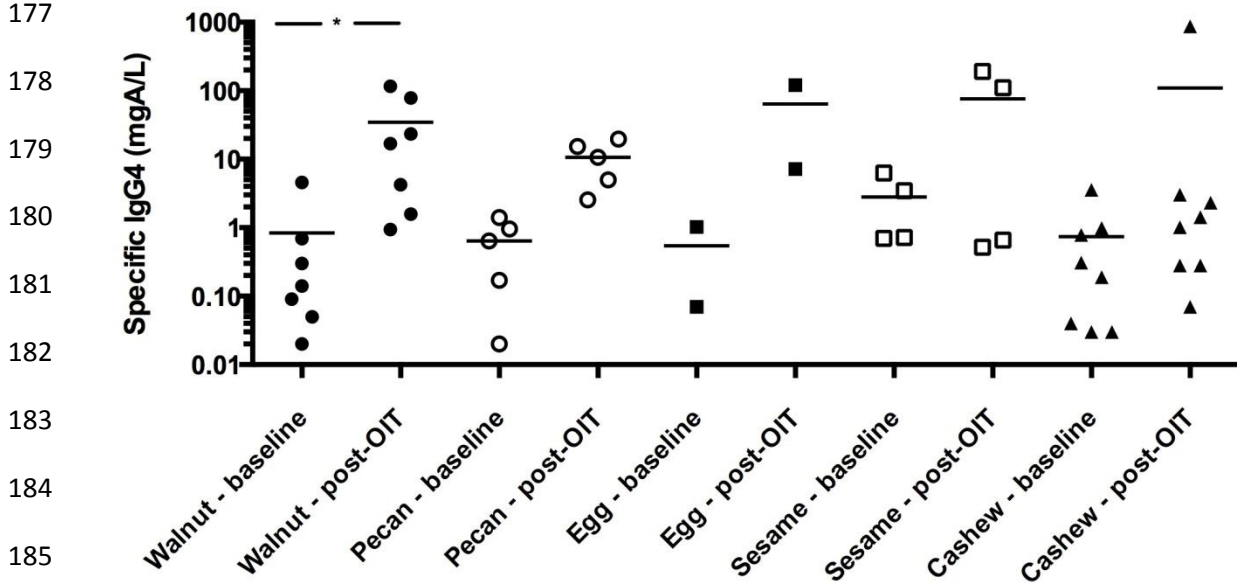

Supplement: 1710-1492-10-1-S1.pdf [file 1710-1492-10-1-S1.pdf]
